# Supplementary material
Source: PubMed Central journal article supplement (PMC4862605)

**Supplementary figure 1: Overview of cytokine/chemokine concentrations (in pg/mL) for each group in blood (red) and seminal plasma (blue).**

**Group 1:** HIV-1 uninfected controls (N=40)

**Group 2:** early HIV-1-infected (ART)-naïve individuals (sampled <90 days from EDI; Fiebig stages 1–5, N=42)

**Group 3:** late HIV-infected ART-naïve individuals (sampled >90 days from EDI; Fiebig stage 6, N=74)

**Group 4:** chronically HIV-infected individuals on ART with completely suppressed HIV RNA in blood plasma (<50 copies/ml, N=96)

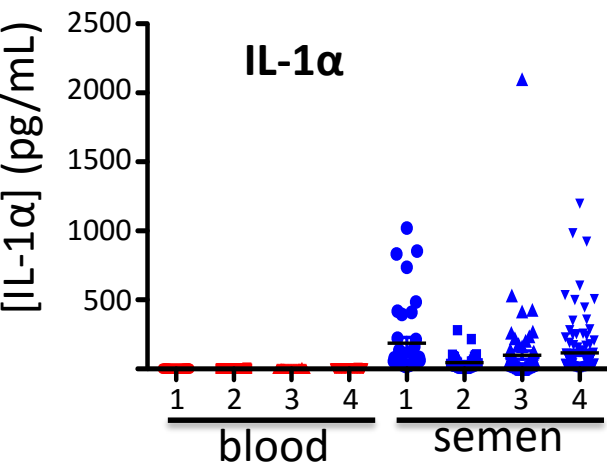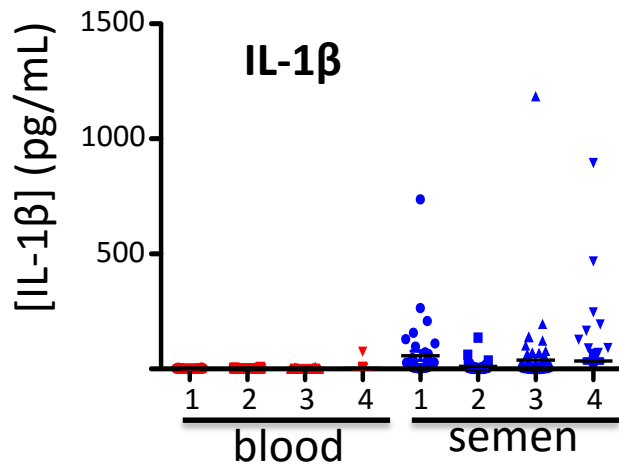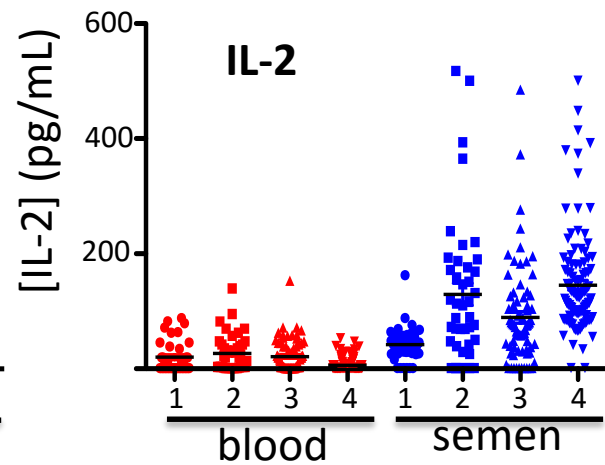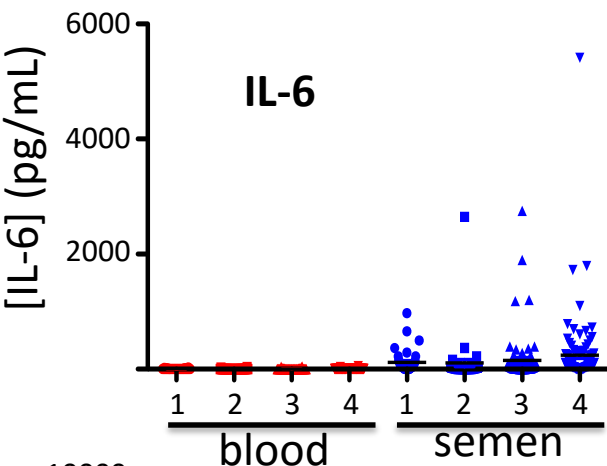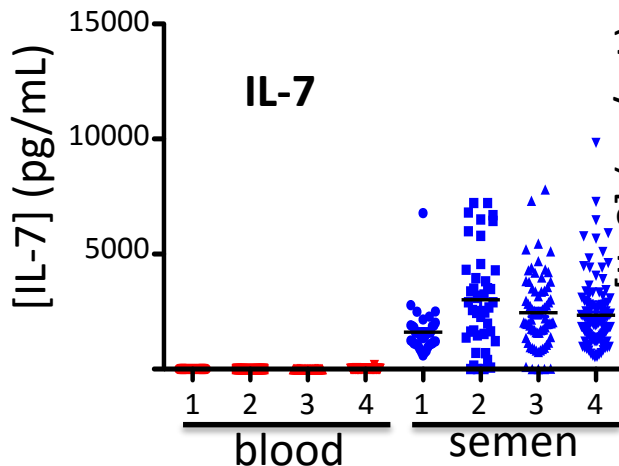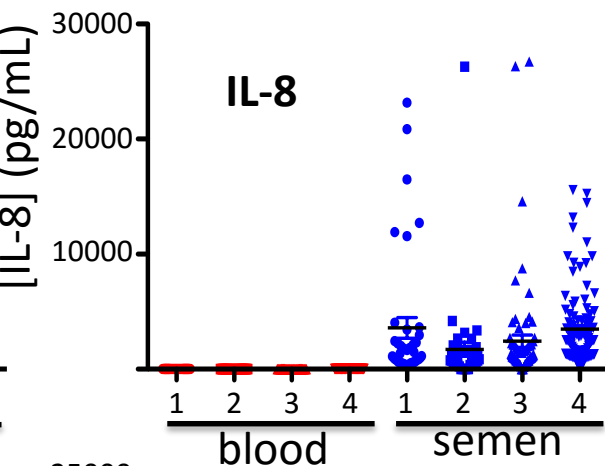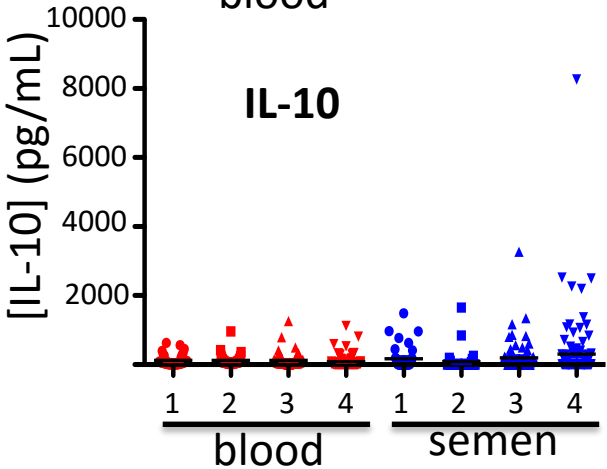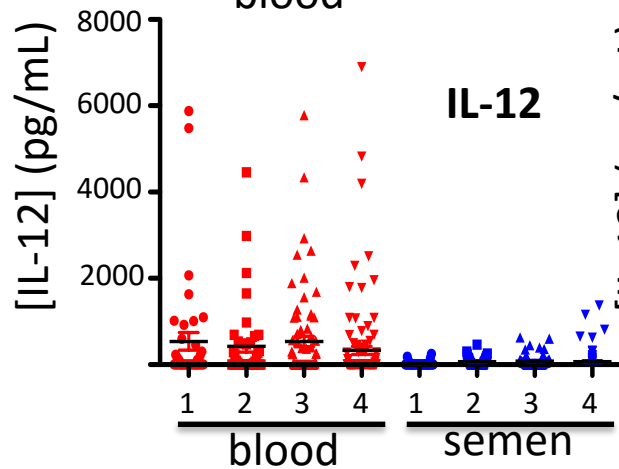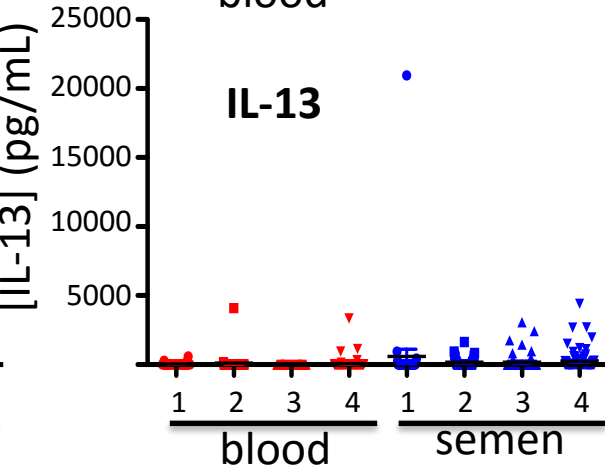

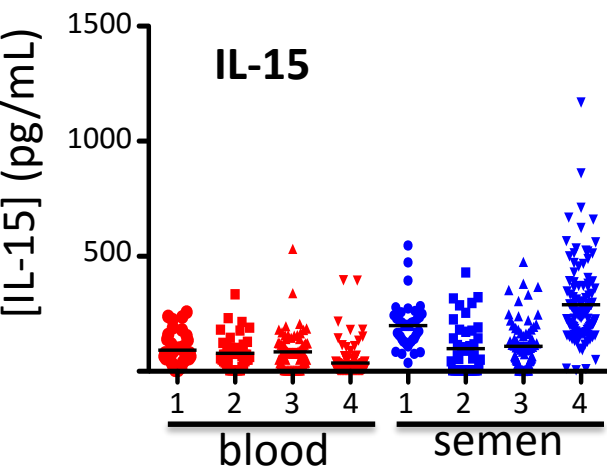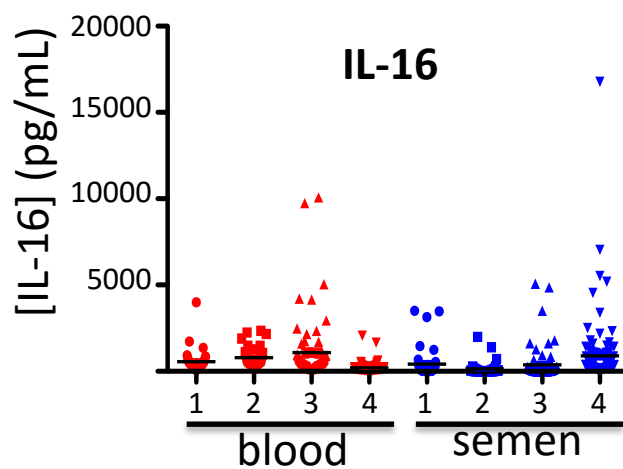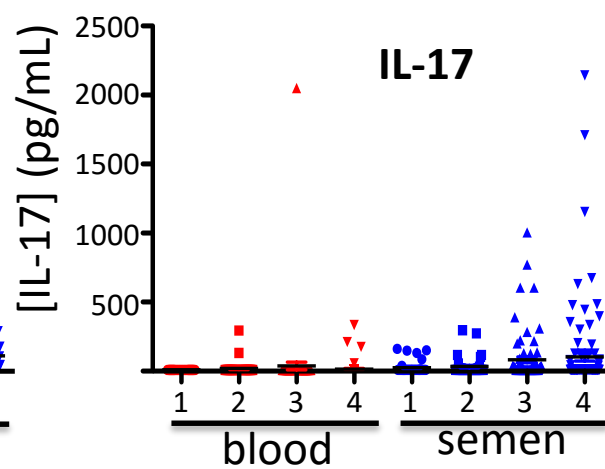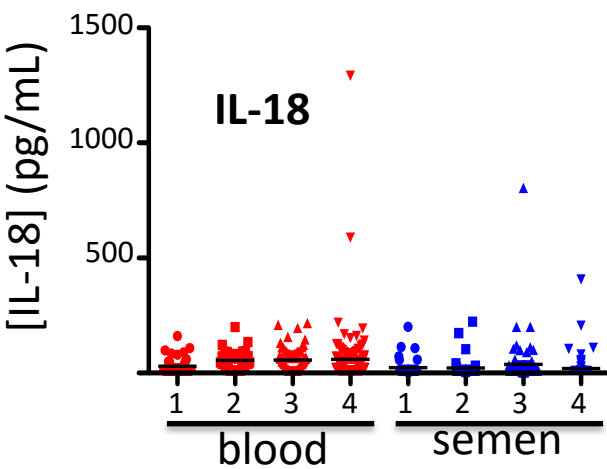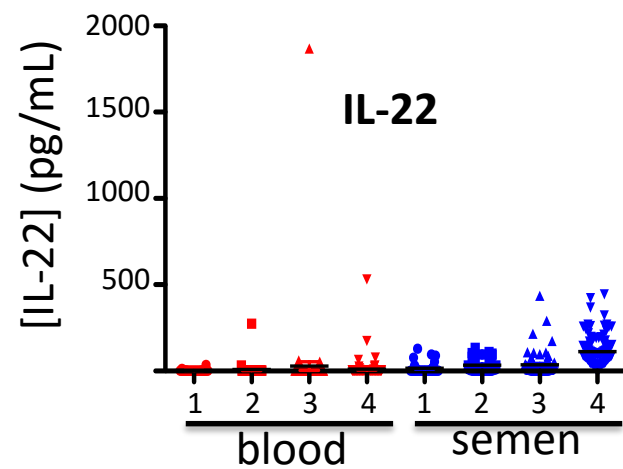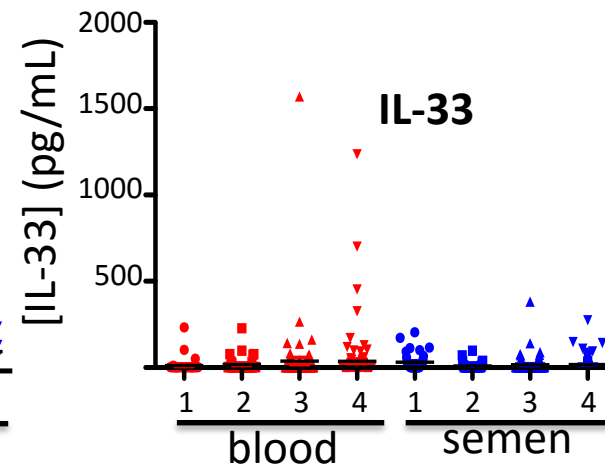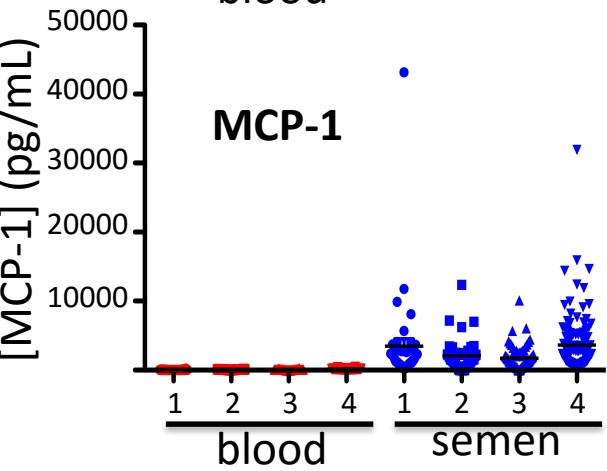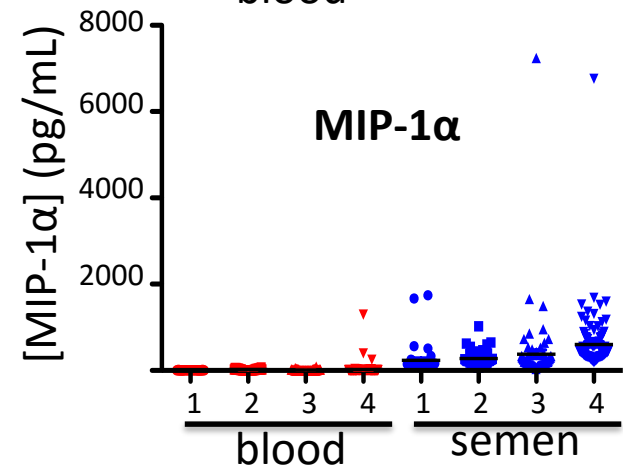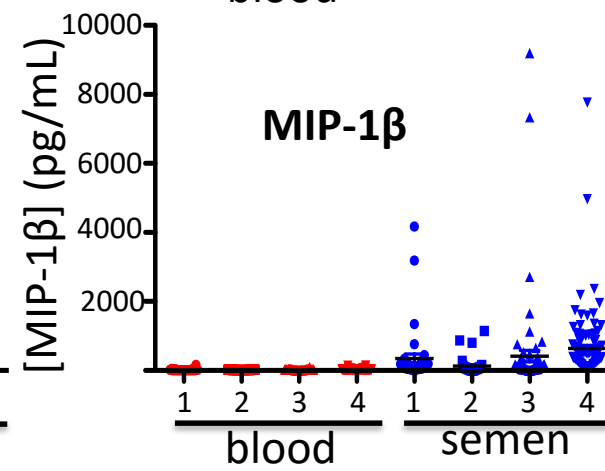

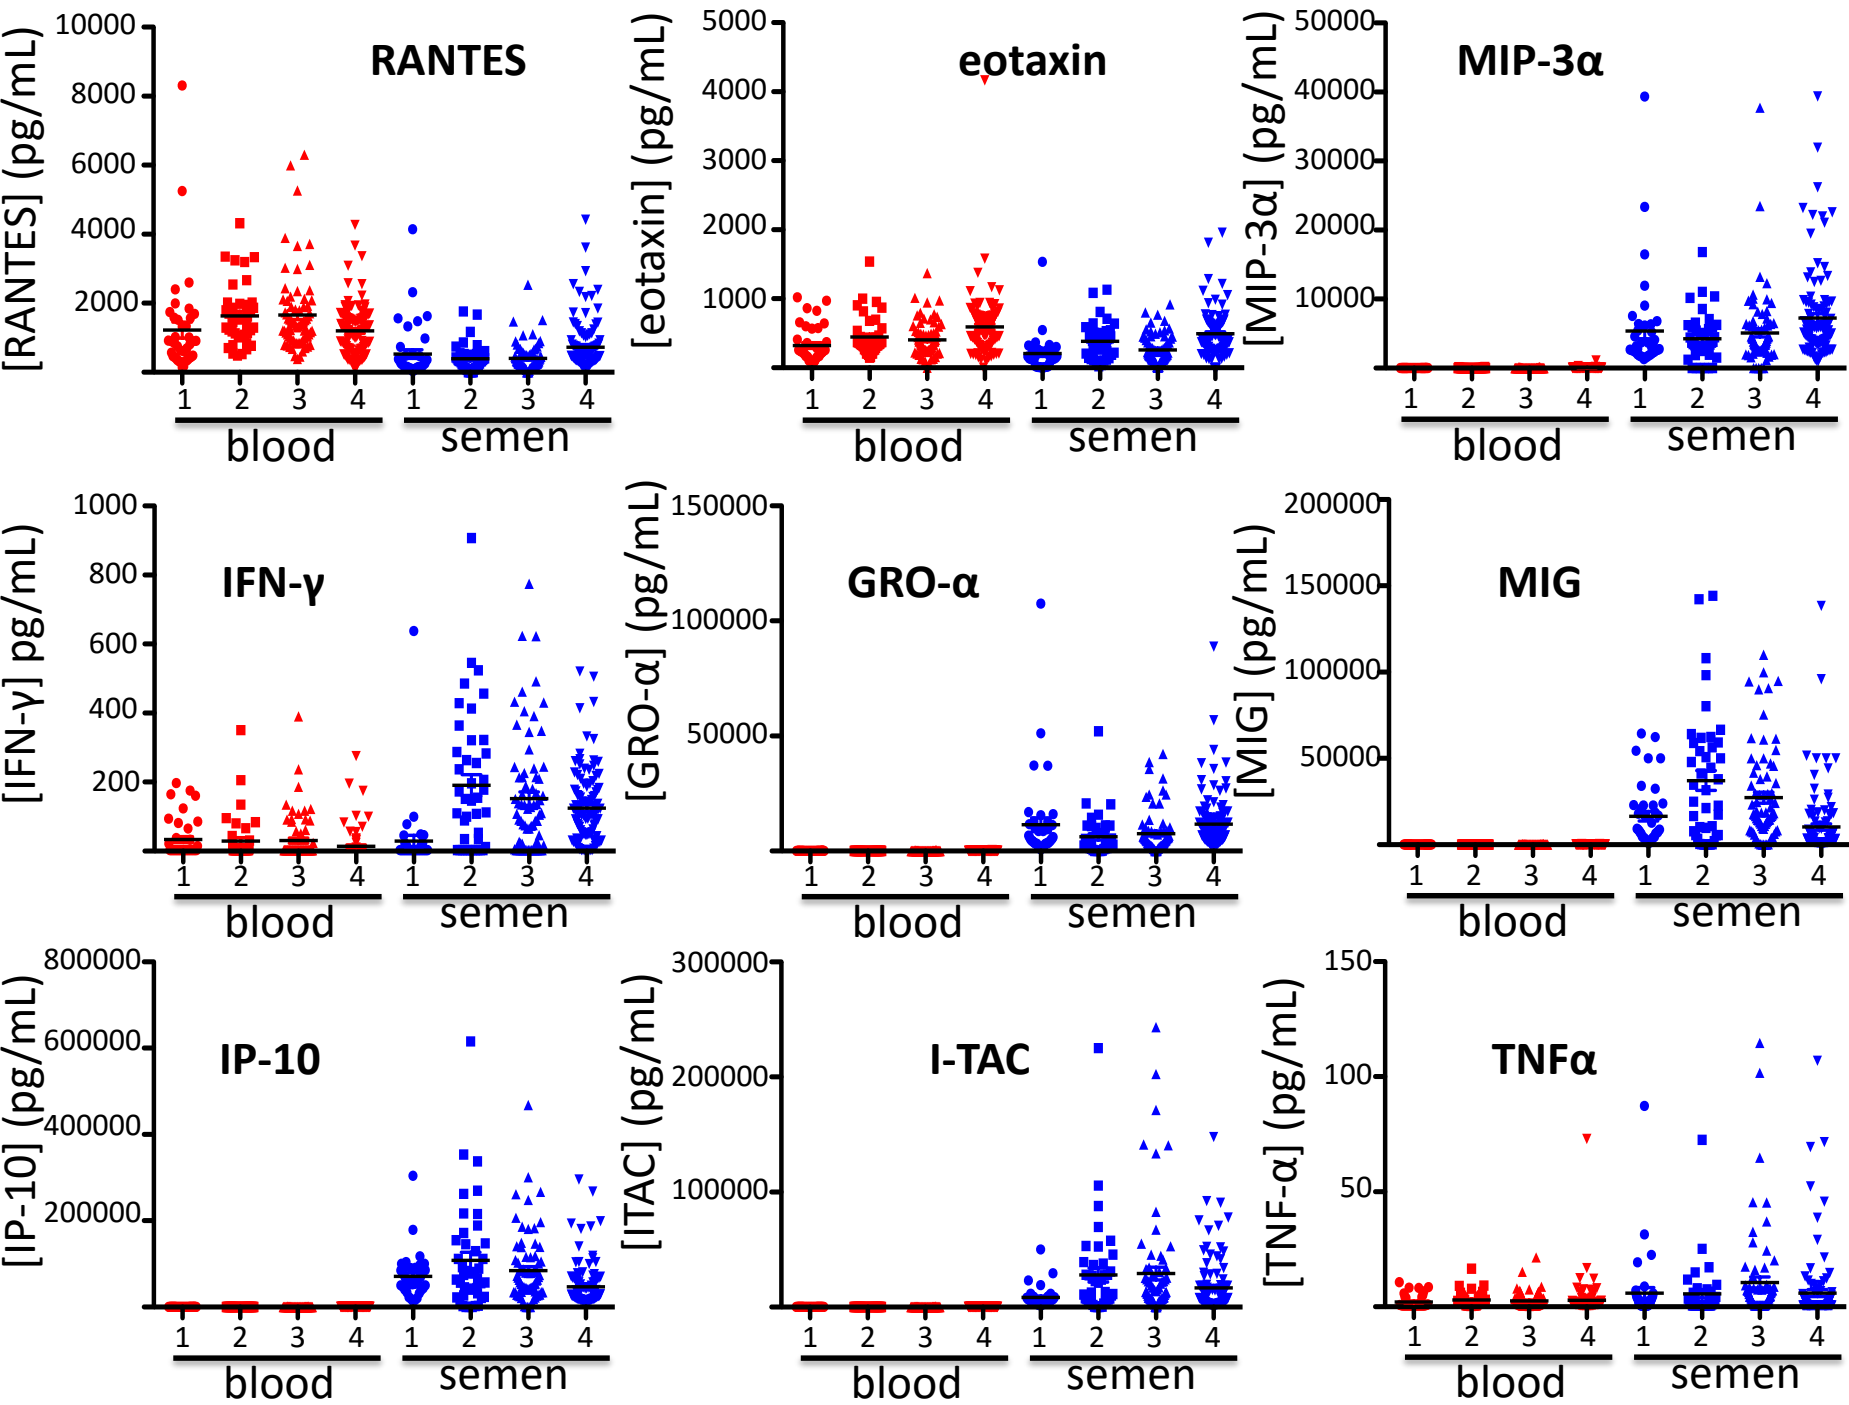

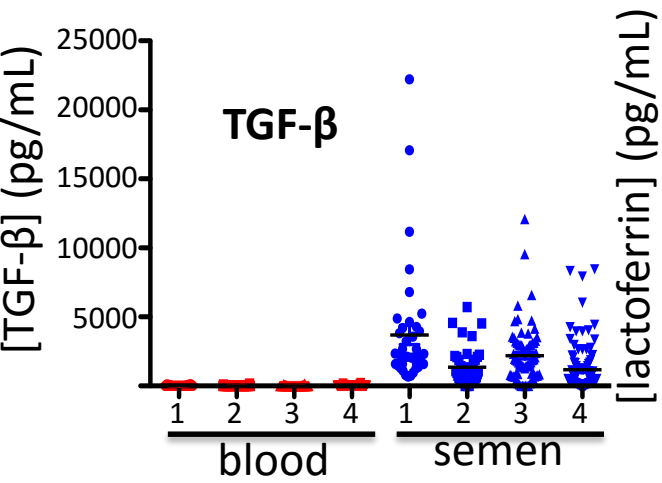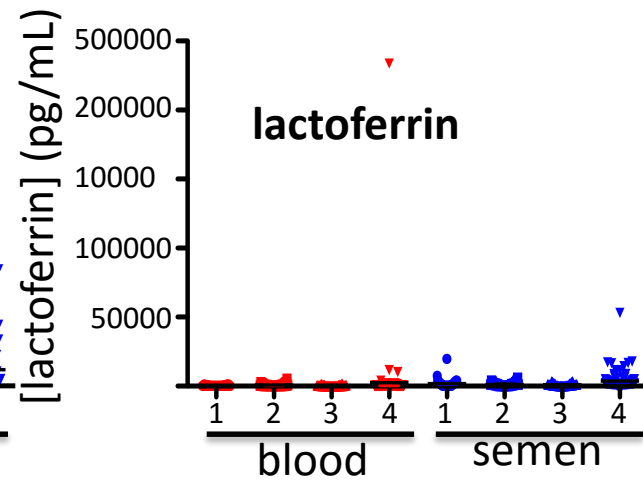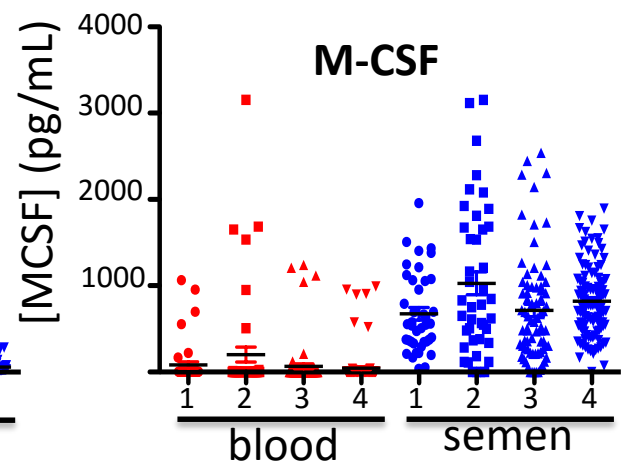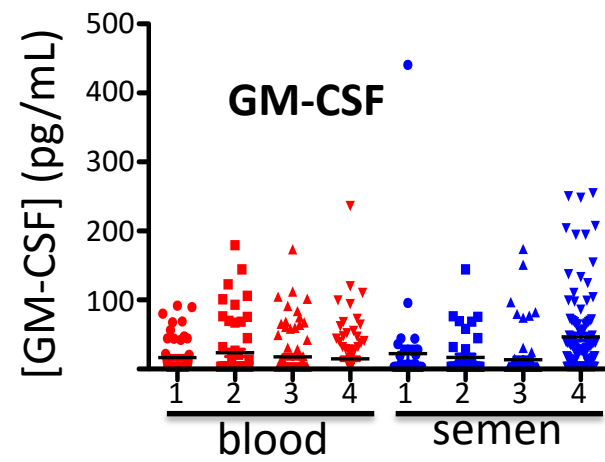

Supplement: NIHMS743636-supplement-Supp855.pdf [file NIHMS743636-supplement-Supp855.pdf]
